# Supplementary material
Source: Royal Society of Chemistry journal article supplement (doi:10.1039/d6ja00124f)
Supplement: d6ja00124f1.xlsx [file d6ja00124f1.xlsx]

## Sheet: Table S1
Table S1 LA-ICP-MS measurement results (ppm) for BCR-2G.
Spot	Ca	Ti	V	Mn	Co	Ni	Zn	Ga
1	52015.5	13604.9	421.683	1561.88	37.0277	10.5	129.63	22.348
2	49402.2	13542.3	406.215	1517.03	36.1623	13.6	124.717	22.4019
3	49453.6	13611.4	412.856	1517.91	36.3858	11.7	131.393	22.3158
4	49942.8	13463.7	408.454	1527.7	36.1323	10.6	127.051	21.3946
5	50090.7	13243.2	412.91	1512.47	36.6786	13.8	127.3	21.6264
6	50468.9	13565.5	415.371	1532.46	36.8944	10.7	126.303	22.4332
7	49643.1	13260.3	406.58	1499.02	36.2671	12.1	127.224	22.0323
Mean (n=7)	50145.3	13470.2	412.01	1524.07	36.5069	11.8571	127.66	22.0789
SD (σ, n=7)	906.383	157.051	5.50905	19.8439	0.361046	1.39386	2.19891	0.415039
RSD	0.0180751	0.0116591	0.0133712	0.0130203	0.00988982	0.117555	0.0172247	0.018798
Ref. value	50456	14100	425	1550	38	13	125	23
PD	-0.00615844	-0.0446684	-0.0305653	-0.0167314	-0.0392925	-0.0879121	0.0212802	-0.0400487
SD, standard deviation; RSD, relative standard deviation.
Ref. value, reference value from GeoReM dataset (https://georem.mpch-mainz.gwdg.de/).
PD, percent deviation of measured mean value from reference value.

## Sheet: Table S2
Table S2 CAMECA SX5-FE EPMA measurement results (wt%) for BL-SP spinel.
Spot	MgO	Al2O3	SiO2	CaO	TiO2	V2O3	Cr2O3	MnO	FeOT	CoO	NiO	ZnO	Ga2O3	Total
BL-SP
Line1-01	21.1077	58.3031	0.0648	0.0042	0.1966	0.0596	9.0732	0.0843	10.8173	0.0258	0.3565	0.0756	0.0114	100.18
Line1-02	21.1319	58.3866	0.1188	0.0041	0.1983	0.0583	9.0657	0.0832	10.7651	0.0256	0.3735	0.0779	0.0089	100.298
Line1-03	20.6351	57.9653	0.0574	0.004	0.1949	0.0557	8.9636	0.0854	10.5358	0.0262	0.3634	0.08	0.0108	98.9776
Line1-04	21.3741	58.4212	0.0853	0.0041	0.1961	0.0589	9.0478	0.0837	10.9506	0.0248	0.3678	0.0774	0.0093	100.701
Line1-05	21.2098	58.3125	0.0697	0.0042	0.1967	0.0591	9.0705	0.0817	10.8402	0.0243	0.3599	0.0813	0.01	100.32
Line1-06	21.443	58.4884	0.0692	0.0042	0.1916	0.0576	9.0767	0.083	10.934	0.0246	0.3629	0.0754	0.007	100.818
Line1-07	21.1028	58.1798	0.0726	0.004	0.192	0.0587	9.0291	0.0789	10.675	0.0229	0.3705	0.0767	0.0116	99.8746
Line1-08	21.0175	58.1661	0.0804	0.0049	0.1952	0.0586	9.0552	0.0898	10.7055	0.0227	0.3606	0.071	0.0111	99.8386
Line1-09	21.3201	58.4077	0.0755	0.0043	0.2017	0.0594	9.0679	0.0915	10.8593	0.0229	0.3746	0.0752	0.0097	100.57
Line1-10	21.2057	58.3247	0.0713	0.0041	0.1933	0.0589	9.1042	0.084	10.7968	0.0244	0.3672	0.0697	0.0091	100.313
Line1-11	21.3988	58.3867	0.0725	0.0039	0.1949	0.061	9.0818	0.0854	10.8836	0.0247	0.3662	0.0701	0.0108	100.64
Line1-12	21.1839	58.3022	0.0714	0.0041	0.1949	0.0583	9.0336	0.0801	10.8163	0.0257	0.3594	0.0732	0.0097	100.213
Line1-13	21.2935	58.3563	0.0712	0.0041	0.1967	0.056	9.0683	0.0815	10.8263	0.0245	0.3666	0.0774	0.0134	100.436
Line1-14	21.1018	58.1955	0.0637	0.0043	0.194	0.0595	9.0532	0.0762	10.7652	0.0262	0.3632	0.0717	0.012	99.9865
Line1-15	20.5761	57.8105	0.0652	0.0045	0.192	0.0564	8.9729	0.0821	10.3794	0.0244	0.3637	0.0785	0.0114	98.6171
Line1-16	20.0013	57.8019	0.0788	0.0045	0.1915	0.0574	8.9688	0.0767	10.4055	0.0248	0.3645	0.0721	0.0118	98.0596
Line1-17	20.7736	57.9329	0.0661	0.0038	0.1954	0.0566	8.9839	0.0806	10.4822	0.0254	0.3652	0.0833	0.0096	99.0586
Line1-18	20.6046	57.8701	0.0562	0.0042	0.2007	0.0584	9.0231	0.075	10.3838	0.0229	0.3662	0.0762	0.0085	98.7499
Line1-19	20.5565	57.8396	0.0964	0.0041	0.2048	0.0577	8.9769	0.0804	10.3322	0.0255	0.3742	0.0745	0.0099	98.6327
Line1-20	20.3404	57.8501	0.0818	0.0037	0.2069	0.0611	8.9832	0.0803	10.3879	0.0234	0.3663	0.0756	0.0114	98.4721
Line2-01	20.6977	57.8754	0.0544	0.0048	0.1985	0.0566	8.9708	0.077	10.4317	0.0253	0.3702	0.0725	0.0106	98.8455
Line2-02	21.2805	58.3328	0.1031	0.0043	0.192	0.0628	9.0526	0.0786	10.7808	0.0256	0.3644	0.0713	0.0067	100.355
Line2-03	21.1336	58.1824	0.0612	0.0038	0.1969	0.0604	9.017	0.0774	10.6566	0.025	0.3674	0.075	0.0087	99.8654
Line2-04	21.1454	58.1954	0.0833	0.0042	0.1914	0.0569	9.0393	0.0774	10.6816	0.0234	0.3635	0.0741	0.0082	99.9441
Line2-05	21.3864	58.3496	0.0624	0.0043	0.195	0.0587	9.0562	0.0825	10.7558	0.0232	0.3591	0.066	0.0083	100.407
Line2-06	21.4142	58.3062	0.1109	0.0038	0.1945	0.0605	9.0699	0.0769	10.7926	0.0252	0.3634	0.0771	0.0172	100.512
Line2-07	21.3441	58.3886	0.0982	0.004	0.192	0.0613	9.0864	0.0789	10.8641	0.0261	0.367	0.0749	0.0089	100.595
Line2-08	20.95	58.0775	0.0865	0.0041	0.1938	0.0591	9.0183	0.0829	10.5911	0.024	0.3669	0.0768	0.0098	99.5408
Line2-09	21.5046	58.4312	0.1265	0.0044	0.1992	0.0588	9.0752	0.0792	10.8939	0.0239	0.3722	0.0725	0.0105	100.852
Line2-10	20.7119	57.9104	0.0601	0.004	0.1961	0.0583	8.9694	0.0829	10.4251	0.0244	0.3644	0.0805	0.0095	98.897
Line2-11	21.2529	58.29	0.1216	0.004	0.1905	0.0566	9.0674	0.0803	10.7398	0.0223	0.3618	0.0786	0.011	100.277
Line2-12	21.1863	58.2608	0.0575	0.0042	0.1914	0.0592	9.045	0.0788	10.7454	0.0228	0.3678	0.0732	0.0077	100.1
Line2-13	21.2381	58.2943	0.0634	0.0043	0.1996	0.0603	9.0468	0.08	10.6854	0.0258	0.3632	0.0745	0.011	100.147
Line2-14	20.8297	58.0136	0.0668	0.0043	0.1966	0.0611	9.01	0.0789	10.5221	0.0239	0.3676	0.0741	0.0098	99.2585
Line2-15	22.3767	59.0485	0.0594	0.0042	0.1952	0.0605	9.2222	0.0866	11.3484	0.0227	0.3719	0.076	0.0059	102.878
Line2-16	20.9308	58.0481	0.1422	0.0047	0.1995	0.0566	9.0468	0.082	10.533	0.0257	0.3654	0.0779	0.0094	99.5221
Line2-17	20.6042	57.8847	0.0595	0.0044	0.2006	0.0631	8.9811	0.0808	10.4344	0.0254	0.3648	0.0752	0.015	98.7932
Line2-18	21.7637	58.6491	0.0833	0.0044	0.2036	0.0596	9.1065	0.0768	10.991	0.0262	0.3652	0.074	0.0078	101.411
Line2-19	21.3846	58.336	0.0576	0.0051	0.1995	0.0586	9.0978	0.0758	10.7699	0.0249	0.3716	0.0767	0.0081	100.466
Line2-20	20.7387	57.9244	0.0659	0.0041	0.2075	0.0607	8.9956	0.0813	10.4804	0.0264	0.363	0.0763	0.0115	99.0358
Line3-01	21.105	58.1503	0.0874	0.0042	0.1974	0.0586	9.0601	0.0856	10.6393	0.0271	0.383	0.0741	0.0104	99.8825
Line3-02	21.5304	58.4504	0.0822	0.0047	0.1944	0.0602	9.1037	0.0808	10.9015	0.026	0.3691	0.0763	0.0072	100.887
Line3-03	21.5692	58.5288	0.0581	0.0041	0.1909	0.0573	9.1032	0.077	10.9298	0.0253	0.3648	0.0799	0.0138	101.002
Line3-04	20.9841	58.1218	0.1094	0.004	0.1969	0.0564	9.038	0.0828	10.5819	0.0231	0.3705	0.08	0.0132	99.6621
Line3-05	21.5262	58.4943	0.09	0.0036	0.1925	0.0581	9.1236	0.0874	10.9626	0.0249	0.3688	0.0672	0.0104	101.01
Line3-06	20.9103	58.0375	0.0986	0.0042	0.1928	0.0619	9.0574	0.0851	10.5922	0.023	0.3689	0.0703	0.0098	99.512
Line3-07	21.617	58.5556	0.0598	0.0045	0.202	0.0616	9.1256	0.0867	10.9384	0.024	0.3826	0.0702	0.0063	101.134
Line3-08	20.6298	57.8658	0.0772	0.0042	0.1932	0.0558	8.9897	0.0836	10.4244	0.023	0.3669	0.0687	0.0073	98.7896
Line3-09	20.2485	57.5937	0.0796	0.0042	0.1884	0.0582	8.926	0.0782	10.1668	0.0243	0.3686	0.0746	0.0071	97.8182
Line3-10	21.3287	58.3769	0.0706	0.0041	0.1952	0.0565	9.0707	0.0827	10.893	0.0247	0.3725	0.0722	0.0088	100.557
Line3-11	21.497	58.5008	0.0724	0.0041	0.1949	0.057	9.122	0.0834	10.9622	0.0246	0.3689	0.0752	0.0077	100.97
Line3-12	21.0824	58.1848	0.0818	0.0049	0.1963	0.0568	9.0473	0.0865	10.6653	0.023	0.3852	0.0689	0.0088	99.892
Line3-13	21.2058	58.3227	0.0803	0.0041	0.1969	0.0572	9.0677	0.0845	10.8461	0.0254	0.3674	0.0767	0.0116	100.346
Line3-14	21.0917	58.2354	0.066	0.0044	0.1949	0.0581	9.0543	0.082	10.6449	0.0258	0.3598	0.068	0.009	99.8943
Line3-15	21.1539	58.2713	0.0756	0.0044	0.1974	0.0594	9.0448	0.0793	10.7325	0.0235	0.3742	0.0671	0.0095	100.093
Line3-16	21.2826	58.3189	0.0702	0.0041	0.1943	0.0587	9.0863	0.0861	10.7633	0.0237	0.3591	0.0749	0.0086	100.331
Line3-17	20.9536	58.0551	0.0737	0.0047	0.1967	0.0603	9.0046	0.0876	10.5881	0.0255	0.3807	0.0668	0.0081	99.5055
Line3-18	21.3936	58.3809	0.1025	0.0877	0.2042	0.0562	9.0847	0.0829	10.829	0.0239	0.3535	0.0706	0.0151	100.685
Line3-19	21.0724	58.2796	0.1181	0.0041	0.1945	0.0566	9.0316	0.0819	10.7781	0.0237	0.3638	0.0657	0.0107	100.081
Line3-20	21.1642	58.2444	0.0688	0.0049	0.2015	0.0606	9.0662	0.0866	10.7591	0.0271	0.3624	0.0729	0.0103	100.129
Line4-01	20.9022	58.1631	0.0599	0.0046	0.2006	0.0591	9.0396	0.0868	10.6382	0.0264	0.3721	0.0775	0.0133	99.6434
Line4-02	20.9855	58.1638	0.1123	0.0044	0.1864	0.0538	9.0472	0.0785	10.6458	0.0216	0.3466	0.0745	0.0078	99.7282
Line4-03	21.2686	58.2392	0.0617	0.0041	0.1934	0.0581	9.0408	0.0885	10.8108	0.0218	0.3688	0.0749	0.014	100.245
Line4-04	21.3648	58.3533	0.0727	0.0038	0.1956	0.0547	9.101	0.0913	10.8083	0.0226	0.3578	0.0785	0.0203	100.525
Line4-05	20.9114	58.1675	0.0593	0.0041	0.202	0.0598	9.0388	0.0898	10.695	0.0252	0.3698	0.0674	0.0076	99.6977
Line4-06	21.1194	58.2484	0.0775	0.0042	0.1991	0.0609	9.0517	0.085	10.6798	0.0229	0.3726	0.0638	0.0095	99.9948
Line4-07	20.9531	58.0977	0.0977	0.0039	0.1933	0.0572	9.0422	0.0855	10.6422	0.0247	0.3642	0.0634	0.0102	99.6353
Line4-08	21.1101	58.1926	0.0673	0.0045	0.1945	0.0569	9.064	0.0821	10.7115	0.0256	0.3647	0.07	0.0097	99.9535
Line4-09	21.2214	58.268	0.1009	0.0048	0.2003	0.0615	9.0397	0.0809	10.8349	0.0224	0.3683	0.0774	0.0102	100.291
Line4-10	21.1016	58.2228	0.0736	0.0041	0.2012	0.0569	9.0366	0.0811	10.7149	0.0225	0.3584	0.0744	0.014	99.9621
Line4-11	21.1366	58.236	0.0605	0.0041	0.2016	0.0598	9.0729	0.0876	10.7863	0.0238	0.373	0.07	0.0105	100.123
Line4-12	21.391	58.3937	0.0841	0.0045	0.1977	0.0607	9.0708	0.0854	10.9306	0.0243	0.3597	0.0738	0.0081	100.684
Line4-13	21.4089	58.4439	0.0706	0.0045	0.194	0.0598	9.1159	0.0842	10.9071	0.025	0.3538	0.0763	0.0124	100.756
Line4-14	20.9001	58.0312	0.0803	0.004	0.1987	0.0582	8.9954	0.0815	10.6141	0.0244	0.36	0.0791	0.0126	99.4396
Line4-15	21.1477	58.3092	0.094	0.0043	0.1924	0.0608	9.0737	0.0854	10.7478	0.024	0.3608	0.0705	0.0056	100.176
Line4-16	21.0378	58.1774	0.0805	0.0041	0.1953	0.0587	9.0686	0.0843	10.7829	0.0229	0.3694	0.0712	0.0129	99.966
Line4-17	21.1425	58.2787	0.072	0.0046	0.2002	0.0574	9.1046	0.0823	10.801	0.0246	0.3662	0.0723	0.0093	100.216
Line4-18	20.9516	58.1736	0.1069	0.0044	0.1985	0.0587	9.0594	0.0882	10.6917	0.0259	0.3647	0.0675	0.0113	99.8024
Line4-19	20.6556	57.9948	0.0869	0.0048	0.1978	0.0567	9.0062	0.0866	10.4281	0.0241	0.3678	0.0724	0.0115	98.9933
Line4-20	21.2488	58.3598	0.0996	0.0044	0.1956	0.0612	9.067	0.0849	10.7855	0.0259	0.3599	0.0671	0.0088	100.368
Line5-01	21.1233	58.2984	0.0709	0.0045	0.2013	0.0605	9.032	0.087	10.7695	0.0249	0.3696	0.0757	0.0122	100.13
Line5-02	21.1488	58.3135	0.0655	0.004	0.1969	0.0592	9.0611	0.0815	10.7312	0.0217	0.3576	0.0698	0.0066	100.117
Line5-03	21.2604	58.3019	0.068	0.0043	0.1937	0.0587	9.0639	0.0836	10.8766	0.024	0.3686	0.0713	0.0136	100.389
Line5-04	21.1542	58.3089	0.074	0.0043	0.1986	0.0614	9.0622	0.0833	10.6558	0.0252	0.3583	0.0721	0.011	100.069
Line5-05	21.4607	58.4835	0.0816	0.0044	0.191	0.0577	9.0823	0.0879	10.8048	0.0241	0.3596	0.069	0.0125	100.719
Line5-06	21.2179	58.3477	0.0766	0.0045	0.1961	0.061	9.0767	0.0778	10.7523	0.0252	0.3581	0.0713	0.0082	100.273
Line5-07	21.1256	58.3152	0.0738	0.0042	0.1952	0.0592	9.0804	0.0779	10.723	0.0277	0.3607	0.071	0.0095	100.123
Line5-08	21.2108	58.3788	0.0746	0.0044	0.1947	0.0574	9.0761	0.0815	10.7541	0.0268	0.3542	0.073	0.0139	100.3
Line5-09	21.1414	58.376	0.083	0.0042	0.1968	0.0646	9.0391	0.0715	10.6293	0.0272	0.3625	0.0709	0.0113	100.078
Line5-10	21.1003	58.3588	0.1751	0.0041	0.1981	0.0644	9.0448	0.0865	10.7006	0.0214	0.3562	0.0779	0.0089	100.197
Line5-11	21.1304	58.2678	0.0593	0.0048	0.179	0.0475	9.0522	0.0867	10.7645	0.0184	0.3298	0.0723	0.0109	100.024
Line5-12	21.2628	58.3021	0.0958	0.0045	0.1947	0.0511	9.0747	0.0864	10.8586	0.0206	0.3714	0.0727	0.0123	100.408
Line5-13	21.0652	58.3449	0.0558	0.0035	0.1945	0.0519	9.0016	0.0848	10.7606	0.0206	0.3443	0.0751	0.0104	100.013
Line5-14	21.2566	58.3202	0.0716	0.0043	0.1993	0.0561	9.0559	0.084	11.007	0.0216	0.3446	0.0713	0.0075	100.5
Line5-15	21.182	58.4045	0.0654	0.0039	0.1933	0.0582	9.0435	0.0827	11.0398	0.0238	0.355	0.0786	0.0117	100.542
Line5-16	21.111	58.3476	0.067	0.0039	0.1996	0.0599	9.0964	0.0881	10.6686	0.0225	0.3567	0.0677	0.0092	100.098
Line5-17	21.034	58.2896	0.0689	0.0039	0.1968	0.0625	9.0926	0.086	11.1152	0.0229	0.3665	0.0762	0.0133	100.428
Line5-18	21.017	58.3304	0.0701	0.0043	0.1982	0.0608	9.0681	0.0828	10.8494	0.0218	0.3599	0.0784	0.0095	100.151
Line5-19	21.0951	58.3195	0.0685	0.0041	0.1961	0.059	9.077	0.0824	10.891	0.023	0.3608	0.0752	0.0117	100.263
Line5-20	21.0289	58.306	0.1454	0.0045	0.2005	0.0576	9.0676	0.0854	10.7477	0.0235	0.3603	0.077	0.0074	100.112
Line6-01	21.0309	58.2757	0.0786	0.0043	0.1995	0.0584	9.0614	0.0866	10.7371	0.0248	0.3688	0.0716	0.0112	100.009
Line6-02	20.9416	58.2323	0.079	0.0041	0.1995	0.0557	9.0557	0.0863	10.8904	0.0224	0.368	0.078	0.0087	100.022
Line6-03	21.0463	58.3631	0.0799	0.0042	0.1947	0.0595	9.0758	0.0821	10.8512	0.0236	0.3622	0.0725	0.0069	100.222
Line6-04	21.0941	58.3706	0.0791	0.0042	0.1944	0.0599	9.089	0.0805	10.9554	0.0244	0.3596	0.0724	0.0068	100.39
Line6-05	21.1642	58.4286	0.0775	0.004	0.1945	0.0593	9.0926	0.0823	10.7704	0.0219	0.3694	0.073	0.0092	100.347
Line6-06	21.0619	58.4082	0.0785	0.0039	0.1964	0.0603	9.076	0.083	10.6865	0.0247	0.3661	0.0728	0.012	100.13
Line6-07	20.8741	58.2387	0.0793	0.0041	0.1947	0.0591	9.073	0.0816	10.7148	0.0235	0.3641	0.0759	0.0122	99.7951
Line6-08	21.0884	58.3301	0.0829	0.0045	0.1918	0.0593	9.0861	0.0852	10.9758	0.0236	0.3685	0.0766	0.0092	100.382
Line6-09	21.1337	58.3078	0.0811	0.0045	0.1976	0.0589	9.0785	0.089	10.6966	0.0263	0.3711	0.0766	0.011	100.133
Line6-10	20.9079	58.2186	0.0746	0.0043	0.1963	0.0601	9.0655	0.0834	10.5678	0.0247	0.3612	0.0703	0.0109	99.6456
Line6-11	21.2191	58.4035	0.0715	0.0042	0.1938	0.0608	9.0884	0.0851	10.7588	0.0249	0.3615	0.0747	0.0051	100.351
Line6-12	21.0555	58.3232	0.1519	0.0046	0.1985	0.0588	9.0952	0.0834	10.7562	0.025	0.3632	0.0733	0.011	100.2
Line6-13	21.1331	58.3263	0.0792	0.004	0.1959	0.0578	9.1026	0.0816	10.8362	0.0248	0.3663	0.0751	0.0096	100.293
Line6-14	20.9857	58.225	0.0808	0.0041	0.1956	0.0556	9.0839	0.0799	10.7812	0.024	0.3661	0.0787	0.0064	99.967
Line6-15	20.9502	58.2009	0.0779	0.0043	0.1945	0.0533	9.0823	0.0844	10.6599	0.022	0.3586	0.0734	0.0066	99.7683
Line6-16	20.9188	58.1626	0.0791	0.004	0.1976	0.058	9.0727	0.0867	10.6346	0.0245	0.3689	0.0698	0.0156	99.6929
Line6-17	21.0175	58.2784	0.0779	0.0044	0.1943	0.0585	9.0794	0.0848	10.6726	0.0247	0.3591	0.0746	0.0121	99.9383
Line6-18	20.9655	58.271	0.0767	0.0042	0.1956	0.0573	9.0712	0.0848	10.8112	0.0239	0.3643	0.0769	0.0053	100.008
Line6-19	20.9375	58.1207	0.0761	0.0039	0.1978	0.0574	9.0705	0.083	10.6543	0.0239	0.3692	0.0756	0.0131	99.683
Line6-20	21.0241	58.1748	0.0774	0.0045	0.1956	0.0596	9.0854	0.0851	10.7084	0.0239	0.363	0.076	0.013	99.8908
1	20.8734	58.1899	0.0721	0.0048	0.2156	0.0581	9.0867	0.0787	11.0454	0.0227	0.3675	0.0749	0.0139	100.104
2	20.8894	58.2812	0.0554	0.0041	0.2066	0.0593	9.0889	0.0834	10.6524	0.0231	0.3648	0.0735	0.0082	99.7903
3	20.991	58.2099	0.0829	0.0044	0.2013	0.0598	9.0848	0.0844	10.8692	0.0232	0.3628	0.0734	0.0153	100.062
4	21.1117	58.1835	0.0754	0.0041	0.1991	0.0583	9.0882	0.0865	10.7907	0.0239	0.371	0.0757	0.008	100.076
5	21.0706	58.2886	0.0829	0.0046	0.2017	0.0588	9.0998	0.0826	10.8122	0.0231	0.3746	0.0721	0.0061	100.178
6	21.1574	58.2672	0.0754	0.0043	0.1983	0.0609	9.0565	0.0814	10.8558	0.025	0.3633	0.0751	0.0064	100.227
7	21.2093	58.3204	0.0722	0.0042	0.1934	0.0581	9.0805	0.0795	10.797	0.0233	0.3627	0.0708	0.0109	100.282
8	21.0958	58.1238	0.0952	0.0044	0.1925	0.0592	9.0497	0.085	10.6663	0.0246	0.3675	0.0734	0.0101	99.8475
9	21.09	58.321	0.0899	0.0042	0.1924	0.0564	9.0693	0.0891	10.6554	0.0267	0.357	0.0739	0.0113	100.037
10	21.1486	58.2962	0.1013	0.0044	0.1979	0.0595	9.0833	0.0831	10.7465	0.0234	0.3606	0.0749	0.0129	100.193
11	21.1261	58.345	0.0833	0.0038	0.1993	0.0592	9.0657	0.0815	10.8069	0.021	0.3686	0.0773	0.0152	100.253
12	21.1513	58.2843	0.1039	0.0042	0.1979	0.0598	9.0573	0.0879	10.7515	0.0226	0.3666	0.084	0.011	100.182
13	21.1173	58.2792	0.057	0.004	0.1971	0.0592	9.0661	0.0886	10.831	0.0245	0.3566	0.0755	0.0079	100.164
14	20.8583	58.1309	0.0628	0.004	0.1944	0.0585	9.0534	0.09	10.7506	0.0231	0.3713	0.0641	0.0097	99.6711
15	20.9099	58.1229	0.0588	0.0045	0.2042	0.06	9.0657	0.0824	11.0512	0.0214	0.36	0.0801	0.0112	100.032
16	21.017	58.3796	0.0655	0.0043	0.2066	0.0572	9.0666	0.0832	10.6587	0.025	0.3705	0.0805	0.0078	100.023
17	21.2454	58.4174	0.063	0.0046	0.2044	0.062	9.0796	0.0837	10.7246	0.0239	0.3558	0.0791	0.0094	100.353
18	21.1913	58.3589	0.0666	0.0039	0.2139	0.0613	9.0802	0.0877	10.7116	0.0243	0.3549	0.0692	0.0098	100.234
19	21.0393	58.2655	0.0677	0.0046	0.2473	0.0634	9.068	0.0866	10.7598	0.024	0.3514	0.0751	0.0074	100.06
20	20.993	58.3416	0.0676	0.0046	0.2444	0.067	9.0692	0.082	10.8318	0.0236	0.3638	0.0881	0.0088	100.185
21	21.0858	58.3068	0.0976	0.0043	0.2373	0.0646	9.0746	0.0904	10.6236	0.0255	0.3672	0.0789	0.0105	100.067
22	21.1107	58.2248	0.0732	0.0048	0.2145	0.0591	9.052	0.0854	10.7477	0.0239	0.3639	0.0758	0.0062	100.042
23	21.0104	58.2898	0.0832	0.0043	0.2075	0.0585	9.086	0.0856	10.6978	0.0225	0.363	0.0744	0.011	99.994
24	21.0593	58.2407	0.0516	0.0041	0.1982	0.0609	9.0766	0.0815	10.7766	0.0238	0.3695	0.0712	0.01	100.024
25	21.0329	58.2718	0.1578	0.0044	0.2005	0.0591	9.0725	0.0833	10.8407	0.0229	0.3645	0.0701	0.0069	100.187
26	21.0957	58.308	0.0689	0.0045	0.1996	0.0603	9.0734	0.088	10.904	0.0245	0.3746	0.0685	0.0069	100.277
27	20.8003	58.0856	0.0614	0.0043	0.1987	0.0574	9.0588	0.0806	10.8937	0.0242	0.3706	0.0746	0.0062	99.7164
28	21.1639	58.249	0.0852	0.0043	0.1968	0.06	9.0738	0.0825	10.7316	0.0238	0.3727	0.0717	0.0101	100.125
29	21.1413	58.2985	0.0974	0.0043	0.201	0.0588	9.0555	0.0872	10.8442	0.0241	0.3717	0.0803	0.0089	100.273
30	21.1766	58.2996	0.0871	0.0042	0.1973	0.0593	9.0755	0.0897	10.8215	0.0244	0.3711	0.072	0.01	100.288
31	21.1124	58.383	0.1428	0.0046	0.2024	0.0576	9.0933	0.0878	10.7205	0.0246	0.3743	0.0735	0.0118	100.289
32	20.9117	58.2388	0.0734	0.0044	0.1961	0.0606	9.0764	0.0829	10.7362	0.0234	0.3766	0.0739	0.0114	99.8658
33	21.0881	58.2542	0.0954	0.004	0.1959	0.0599	9.0788	0.0867	10.7182	0.0243	0.367	0.0736	0.0085	100.055
34	20.8274	58.0863	0.0586	0.0045	0.1981	0.0578	9.06	0.0859	10.7253	0.024	0.369	0.0728	0.0109	99.5806
35	21.107	58.2436	0.0558	0.0042	0.1949	0.0606	9.089	0.0871	10.8325	0.0231	0.3723	0.0769	0.0085	100.155
36	21.1137	58.2736	0.1238	0.0042	0.199	0.0604	9.0902	0.0839	10.795	0.0248	0.3678	0.0748	0.0084	100.22
37	21.0284	58.2128	0.0677	0.0042	0.1993	0.0595	9.0708	0.0874	10.9108	0.0235	0.3684	0.0759	0.0095	100.118
38	21.0538	58.3777	0.0624	0.0043	0.2034	0.0601	9.0827	0.0835	10.64	0.0225	0.3661	0.0721	0.0106	100.039
39	20.8935	58.1762	0.0626	0.0042	0.2041	0.0614	9.0878	0.0891	10.6922	0.0238	0.3705	0.0768	0.0104	99.7526
40	20.9409	58.1712	0.0624	0.0044	0.2079	0.0594	9.0844	0.087	10.7577	0.0236	0.3668	0.0737	0.0114	99.8508
41	20.976	58.2373	0.0661	0.0041	0.2129	0.0571	9.0707	0.0884	10.8071	0.0251	0.3657	0.0729	0.0099	99.9933
42	21.0262	58.2637	0.0606	0.0043	0.2322	0.0604	9.0787	0.0838	10.679	0.0232	0.363	0.0736	0.0103	99.959
43	20.9891	58.2285	0.0726	0.0046	0.2001	0.0684	9.0721	0.0856	10.727	0.0229	0.3489	0.0766	0.0111	99.9075
44	21.5673	57.9085	0.0999	0.0049	0.1954	0.0689	9.1301	0.0957	10.3625	0.0251	0.376	0.08	0.0099	99.9242
45	21.521	58.2163	0.104	0.0038	0.1974	0.0531	9.1441	0.1002	10.3283	0.0235	0.3746	0.0812	0.0317	100.179
46	21.4277	58.1647	0.0759	0.0036	0.1967	0.0618	9.1365	0.0956	10.3878	0.0236	0.3748	0.0828	0.0093	100.041
47	21.5223	58.3465	0.0749	0.0028	0.1957	0.0606	9.1649	0.0955	10.4939	0.0218	0.376	0.0781	0.0101	100.443
48	21.3849	58.1514	0.0685	0.0059	0.1974	0.0711	9.2453	0.0944	10.4709	0.0229	0.3651	0.083	0.0082	100.169
49	21.4962	58.4013	0.0877	0.0045	0.2019	0.0644	9.1015	0.0959	10.4762	0.0243	0.3742	0.0807	0.01	100.419
50	21.3759	58.1766	0.0854	0.0055	0.1974	0.0747	9.0946	0.0972	10.4861	0.0245	0.373	0.0759	0.0125	100.079
51	21.5183	58.3491	0.086	0.0028	0.2006	0.069	9.1408	0.0964	10.5177	0.024	0.3715	0.0782	0.0109	100.465
52	21.3764	58.0012	0.0849	0.0021	0.2017	0.0664	9.1417	0.0995	10.4831	0.023	0.3658	0.0831	0.0119	99.9408
53	21.3987	58.2837	0.1448	0.0042	0.2039	0.0693	9.0475	0.0995	10.5356	0.0228	0.3667	0.0771	0.0179	100.272
54	21.5831	58.3699	0.083	0.0057	0.1952	0.0691	9.1001	0.0939	10.4434	0.0235	0.3714	0.0773	0.0076	100.423
55	21.496	58.682	0.0851	0.0038	0.1956	0.0692	9.046	0.0972	10.4384	0.0235	0.3701	0.079	0.0127	100.599
56	21.2004	58.2809	0.0828	0.0034	0.1967	0.0611	9.0853	0.0945	10.4219	0.0241	0.3712	0.0808	0.0126	99.9157
57	21.5133	58.5773	0.0982	0.0034	0.1952	0.062	9.092	0.0924	10.4587	0.0231	0.3767	0.0766	0.0076	100.576
58	21.4604	58.4328	0.0856	0.0045	0.1942	0.0606	9.0918	0.0953	10.4575	0.0273	0.3767	0.0786	0.0079	100.373
59	21.5277	58.7798	0.1647	0.0055	0.2034	0.0664	8.8178	0.0876	10.353	0.023	0.3714	0.0842	0.0095	100.494
60	21.6059	58.6498	0.0804	0.0029	0.2049	0.0645	8.9951	0.0924	10.3359	0.024	0.3735	0.0762	0.0085	100.514
61	21.583	58.6913	0.1061	0.0034	0.2029	0.0628	8.9997	0.0933	10.3924	0.0215	0.3738	0.0752	0.0099	100.615
62	21.5732	58.7621	0.1014	0.0048	0.2031	0.0618	9.0094	0.0876	10.263	0.0242	0.3711	0.0845	0.0114	100.558
63	21.3373	58.3134	0.0783	0.0034	0.2009	0.0598	8.9143	0.0885	10.4231	0.0249	0.3806	0.0817	0.0071	99.9133
64	21.4638	58.4564	0.0807	0.0035	0.2057	0.0661	8.9682	0.089	10.4022	0.0244	0.3735	0.0774	0.0096	100.22
65	21.4945	58.449	0.0757	0.0048	0.2111	0.0588	9.0157	0.0834	10.1905	0.0252	0.3729	0.0894	0.0095	100.081
66	21.3378	58.6209	0.0828	0.005	0.2037	0.062	8.9897	0.0931	10.6334	0.0237	0.3678	0.0788	0.0077	100.506
67	21.4334	58.6526	0.0869	0.0036	0.2004	0.0636	9.0715	0.0935	10.5661	0.0258	0.3668	0.0793	0.0103	100.654
68	21.251	58.2666	0.0862	0.0069	0.2057	0.0646	9.0496	0.0883	10.592	0.0255	0.3701	0.0773	0.0129	100.097
69	21.718	58.7004	0.0828	0.0034	0.2222	0.0601	9.1469	0.0913	10.3849	0.0214	0.3664	0.0802	0.0112	100.889
70	21.5274	58.3518	0.0858	0.0036	0.2154	0.0691	9.091	0.0913	10.3664	0.0266	0.3554	0.0788	0.007	100.27
71	21.3457	58.3721	0.0926	0.005	0.2341	0.0622	9.1645	0.0953	10.2275	0.0252	0.3495	0.0806	0.0181	100.072
72	21.5045	58.6192	0.0755	0.0034	0.2181	0.0659	9.0005	0.0851	10.3244	0.0243	0.3712	0.0747	0.0117	100.379
73	21.5472	58.3159	0.0708	0.0039	0.2042	0.0635	8.8987	0.0906	10.4818	0.0263	0.3687	0.0763	0.0065	100.154
74	21.5227	58.3307	0.0715	0.0042	0.2014	0.0511	9.1046	0.0894	10.3301	0.0229	0.368	0.0738	0.008	100.178
75	21.5115	59.3506	0.0638	0.0067	0.2106	0.0641	8.9931	0.0851	10.1553	0.0223	0.3514	0.0837	0.015	100.913
76	21.2333	58.5402	0.0657	0.0035	0.2091	0.0697	8.8634	0.0939	10.1847	0.0242	0.3617	0.076	0.0085	99.7339
77	21.3754	58.1748	0.062	0.0034	0.2084	0.0704	9.0186	0.0893	10.4093	0.0232	0.3661	0.077	0.0085	99.8864
78	21.3215	57.8869	0.071	0.0035	0.2026	0.0615	9.0392	0.0922	10.369	0.0219	0.3698	0.0785	0.0117	99.5293
79	21.6181	58.1985	0.0734	0.0059	0.2009	0.064	8.9763	0.0892	10.4391	0.0259	0.3699	0.0804	0.0157	100.157
80	21.5592	58.4944	0.0734	0.0036	0.2019	0.0582	8.9556	0.0905	10.4444	0.0241	0.3689	0.0779	0.0128	100.365
81	21.6508	58.5343	0.0742	0.0024	0.1994	0.0663	9.0386	0.091	10.3811	0.0269	0.3761	0.0807	0.0087	100.53
82	21.3166	57.7709	0.071	0.0053	0.2119	0.0552	9.1397	0.0855	10.6012	0.0234	0.3744	0.0831	0.0083	99.7465
83	21.3041	57.9022	0.0717	0.0038	0.2084	0.0668	9.1166	0.0902	10.579	0.027	0.3731	0.0783	0.0177	99.8389
84	21.3689	57.8779	0.0845	0.0046	0.2042	0.0626	9.117	0.0873	10.5474	0.0262	0.3692	0.0823	0.0142	99.8463
85	21.4488	58.2581	0.1776	0.005	0.2019	0.061	9.1525	0.0924	10.5674	0.0232	0.3721	0.0792	0.0116	100.451
86	21.5288	58.1298	0.1344	0.0028	0.2011	0.069	9.2067	0.0904	10.6681	0.0256	0.37	0.0792	0.0085	100.514
87	21.3933	57.8391	0.073	0.0034	0.1869	0.0635	9.1231	0.0861	10.5621	0.0227	0.3701	0.0748	0.0079	99.806
88	21.3433	58.1383	0.0792	0.0028	0.189	0.0649	9.1373	0.084	10.5278	0.0224	0.3697	0.0757	0.0085	100.043
89	21.2568	58.0851	0.1089	0.0052	0.1864	0.0618	9.1296	0.0856	10.5874	0.025	0.3784	0.0759	0.0103	99.9964
90	21.3482	58.2692	0.074	0.0052	0.1897	0.0647	9.158	0.084	10.6961	0.0223	0.3672	0.0694	0.009	100.357
91	21.2157	58.0803	0.0685	0.0049	0.1917	0.0626	9.238	0.085	10.6719	0.0243	0.3741	0.0746	0.0106	100.102
92	21.3244	58.3279	0.0879	0.0034	0.1909	0.0636	9.0945	0.0861	10.6776	0.0226	0.3731	0.0774	0.0091	100.338
93	21.2057	58.105	0.0847	0.0031	0.1949	0.0623	9.0876	0.0878	10.6876	0.0239	0.3709	0.0765	0.0115	100.001
94	21.3462	58.2752	0.0847	0.0046	0.193	0.0619	9.1338	0.0929	10.7199	0.0247	0.3683	0.0708	0.0121	100.388
95	21.2065	57.9285	0.0843	0.0032	0.1939	0.0635	9.1345	0.0897	10.6845	0.0247	0.3691	0.0772	0.0109	99.8705
96	21.2285	58.2214	0.0824	0.0053	0.1982	0.0652	9.0402	0.0853	10.7381	0.0262	0.3706	0.0739	0.0078	100.143
97	21.4124	58.2984	0.0847	0.0041	0.1887	0.0619	9.093	0.0861	10.6439	0.0235	0.3747	0.074	0.0098	100.355
98	21.3227	58.6075	0.0839	0.0028	0.1892	0.062	9.0392	0.0813	10.6392	0.0246	0.3689	0.0742	0.009	100.504
99	21.0298	58.2048	0.0854	0.0042	0.1874	0.0621	9.0784	0.0835	10.6224	0.0254	0.374	0.0727	0.0064	99.8365
100	21.3432	58.5095	0.0712	0.0046	0.1872	0.0629	9.0849	0.0865	10.6597	0.0234	0.3708	0.0758	0.0096	100.489
101	21.2893	58.3601	0.0787	0.0032	0.1905	0.0637	9.0849	0.0815	10.6586	0.0254	0.3751	0.0757	0.0077	100.294
102	21.3575	58.7228	0.0764	0.0035	0.2004	0.0641	8.8106	0.083	10.5519	0.0246	0.371	0.0772	0.0078	100.351
103	21.4352	58.5763	0.0836	0.0043	0.1987	0.0619	8.9881	0.0822	10.5343	0.0279	0.3791	0.0746	0.0046	100.451
104	21.4135	58.6257	0.0762	0.0053	0.1927	0.0624	8.9925	0.083	10.5918	0.024	0.3759	0.0759	0.0097	100.529
105	21.3983	58.6811	0.1183	0.0043	0.1934	0.0633	9.0027	0.082	10.4607	0.0262	0.371	0.0714	0.0075	100.48
106	21.1687	58.2404	0.0813	0.0041	0.195	0.0634	8.9073	0.0767	10.6233	0.0249	0.3843	0.0771	0.0096	99.8561
107	21.2963	58.3863	0.0789	0.0052	0.1979	0.0631	8.961	0.0834	10.6016	0.0268	0.384	0.0752	0.0094	100.169
108	21.3222	58.3725	0.0802	0.0041	0.2019	0.0656	9.0089	0.0768	10.3864	0.0223	0.3803	0.0771	0.0086	100.007
109	21.1684	58.5467	0.0892	0.0039	0.1959	0.0629	8.9827	0.0826	10.8377	0.0239	0.368	0.0762	0.0066	100.445
110	21.2636	58.5792	0.0886	0.0031	0.1949	0.0632	9.0644	0.0838	10.769	0.023	0.3715	0.0762	0.0091	100.59
111	21.0819	58.1923	0.0926	0.0039	0.1942	0.0621	9.0424	0.0851	10.7956	0.0276	0.3703	0.0757	0.0058	100.03
112	21.5445	58.6237	0.0851	0.0073	0.2136	0.0639	9.1399	0.0844	10.5847	0.0243	0.3633	0.0752	0.008	100.818
113	21.356	58.2786	0.0877	0.0048	0.2056	0.065	9.084	0.0841	10.5655	0.023	0.3605	0.0744	0.0061	100.195
114	21.1728	58.2999	0.0794	0.0045	0.2142	0.0627	9.1576	0.085	10.4244	0.0195	0.3524	0.076	0.0111	99.9595
115	21.335	58.5452	0.0813	0.0053	0.2146	0.0637	8.9936	0.0798	10.5227	0.0253	0.3706	0.0792	0.008	100.324
116	21.3782	58.2444	0.0717	0.0046	0.1962	0.0648	8.8917	0.0812	10.6829	0.0261	0.3761	0.0745	0.0066	100.099
117	21.3552	58.2576	0.0787	0.0062	0.1967	0.0617	9.0974	0.0816	10.5282	0.0267	0.3713	0.0743	0.0103	100.146
118	21.3402	59.2736	0.073	0.0036	0.2029	0.0656	8.9862	0.0842	10.3503	0.0243	0.3598	0.0736	0.0119	100.849
119	21.0638	58.4672	0.0691	0.0043	0.2016	0.0624	8.8567	0.0803	10.3805	0.0247	0.3624	0.0752	0.0082	99.6564
120	21.2135	58.1033	0.0999	0.0062	0.1984	0.0644	9.0112	0.0851	10.6078	0.0236	0.4014	0.0752	0.012	99.902
121	21.153	57.8137	0.0742	0.0062	0.1942	0.0629	9.0322	0.086	10.5682	0.0219	0.3728	0.0756	0.0109	99.4718
122	21.4468	58.1236	0.0809	0.0036	0.1959	0.065	8.9693	0.0817	10.6396	0.0269	0.3766	0.0751	0.0119	100.097
123	21.3886	58.4202	0.074	0.005	0.1947	0.0615	8.9485	0.0841	10.645	0.0259	0.3722	0.0732	0.0103	100.303
124	21.476	58.4476	0.1247	0.0043	0.1974	0.0653	9.0321	0.0804	10.581	0.0249	0.375	0.0752	0.0058	100.49
125	21.1494	57.6987	0.0732	0.0059	0.2037	0.0628	9.1323	0.0796	10.8047	0.0289	0.3746	0.0767	0.0121	99.7026
126	21.1336	57.8268	0.0779	0.0042	0.2017	0.0633	9.1096	0.0826	10.7824	0.0239	0.3774	0.0735	0.0112	99.7681
127	21.201	57.8102	0.0642	0.0034	0.1964	0.0637	9.1097	0.0837	10.7497	0.0237	0.3766	0.0798	0.0109	99.773
128	21.2784	58.1931	0.1326	0.0039	0.1935	0.065	9.1451	0.0802	10.7705	0.0227	0.3733	0.0719	0.0111	100.341
129	21.3601	58.0725	0.0618	0.006	0.1961	0.0635	9.1991	0.0798	10.8728	0.0261	0.3724	0.0744	0.0109	100.396
130	21.3011	58.3342	0.0704	0.0048	0.1971	0.0623	9.1192	0.081	10.7672	0.0298	0.3742	0.0779	0.0106	100.43
131	21.4074	58.44	0.101	0.0043	0.1957	0.0633	9.1125	0.0804	10.8415	0.0255	0.3735	0.0743	0.0057	100.725
132	21.1119	58.0921	0.0817	0.0042	0.2079	0.0633	9.1242	0.0875	10.4744	0.0238	0.3604	0.0751	0.0098	99.7163
133	21.2914	58.6231	0.073	0.0039	0.1967	0.0635	9.1587	0.0895	10.6395	0.0238	0.3668	0.0756	0.0246	100.63
134	21.4275	58.4481	0.0928	0.0039	0.1934	0.0629	8.9828	0.0845	10.5636	0.0259	0.3649	0.0729	0.0056	100.329
135	21.3603	58.3005	0.0614	0.0041	0.1945	0.0618	9.1006	0.0892	10.5325	0.0271	0.3695	0.0749	0.0057	100.182
136	21.5263	58.3608	0.0896	0.0031	0.1929	0.062	9.0542	0.0831	10.6326	0.0257	0.3706	0.0762	0.0108	100.488
137	21.4788	58.2299	0.0727	0.0041	0.1967	0.0635	9.0676	0.0819	10.7571	0.0242	0.3694	0.0681	0.0078	100.422
138	21.3234	58.1	0.0762	0.005	0.2007	0.0635	9.0325	0.0865	10.8026	0.0233	0.3751	0.0722	0.0139	100.175
139	21.3387	58.9399	0.086	0.005	0.2029	0.0634	9.0581	0.0885	10.6689	0.0257	0.3716	0.075	0.0096	100.933
140	21.3203	58.5324	0.0877	0.0041	0.1962	0.0635	9.021	0.085	10.6022	0.0207	0.372	0.0731	0.0096	100.388
141	21.2981	58.2771	0.0809	0.0043	0.1992	0.0657	9.1005	0.0845	10.5856	0.0232	0.3781	0.0728	0.0115	100.182
142	21.2612	58.1585	0.0753	0.0049	0.1959	0.0637	9.1192	0.0877	10.6081	0.0238	0.3721	0.0745	0.0072	100.052
143	21.4106	58.804	0.1001	0.005	0.2376	0.069	9.1122	0.0842	10.3609	0.0255	0.3752	0.0769	0.008	100.669
144	21.2818	58.4923	0.0781	0.007	0.2202	0.0691	9.0427	0.0843	10.3776	0.0265	0.3834	0.0786	0.0098	100.151
145	21.1765	58.5844	0.1532	0.0064	0.2164	0.067	8.982	0.0836	10.4981	0.026	0.378	0.0749	0.0068	100.253
146	21.0973	58.2262	0.0582	0.0059	0.2161	0.068	9.0716	0.086	10.5449	0.026	0.3835	0.0798	0.01	99.8735
147	21.1004	58.1446	0.0539	0.0052	0.2236	0.0701	9.1157	0.0832	10.5622	0.0262	0.3814	0.0778	0.0092	99.8535
148	21.0016	57.9845	0.0501	0.0062	0.2251	0.0669	8.9979	0.0882	10.4531	0.0261	0.3788	0.0765	0.0138	99.3688
149	21.3291	58.3454	0.0796	0.0042	0.1966	0.0643	8.9362	0.0806	10.796	0.0264	0.3704	0.0757	0.0087	100.313
150	21.3973	58.3231	0.0779	0.0057	0.195	0.0665	9.0068	0.0822	10.7309	0.0261	0.3717	0.0744	0.0127	100.37
151	21.4971	58.3041	0.0785	0.0052	0.1942	0.064	8.9587	0.0823	10.6781	0.0242	0.3693	0.0732	0.0108	100.34
152	21.3742	58.1997	0.0781	0.0046	0.1964	0.0649	9.0863	0.082	10.6932	0.0232	0.3759	0.0758	0.01	100.264
153	21.1853	57.8414	0.0789	0.0056	0.1969	0.0653	8.991	0.0781	10.6244	0.0233	0.3747	0.0793	0.0124	99.5566
154	21.2679	58.1293	0.1085	0.0067	0.2246	0.0663	9.0049	0.0825	10.9578	0.0253	0.3835	0.0827	0.011	100.351
155	21.2648	58.0047	0.0704	0.0062	0.2182	0.0638	8.981	0.0808	11.0954	0.0251	0.3766	0.074	0.0079	100.269
156	21.1457	57.8453	0.0828	0.0042	0.2192	0.0643	8.9606	0.0812	11.095	0.025	0.3843	0.0739	0.0116	99.9931
157	21.0842	57.7579	0.0856	0.0066	0.2164	0.0629	8.9595	0.0768	11.1355	0.0299	0.3824	0.0762	0.0121	99.886
158	21.2388	58.3642	0.0712	0.0071	0.239	0.0692	9.0521	0.0816	10.8618	0.0246	0.3703	0.0752	0.0142	100.469
159	20.8585	58.0583	0.0819	0.0066	0.2116	0.0638	8.9836	0.0859	10.9076	0.0232	0.372	0.0758	0.0129	99.7417
160	20.9043	57.8715	0.0764	0.0048	0.219	0.0648	8.8494	0.086	10.8581	0.0222	0.377	0.0784	0.012	99.4239
161	21.2944	58.4571	0.067	0.009	0.195	0.0636	9.1781	0.0828	10.557	0.0225	0.3783	0.0739	0.0104	100.389
162	21.3613	58.0329	0.1607	0.0099	0.1957	0.0645	9.0472	0.0851	10.5825	0.0243	0.3761	0.0763	0.0104	100.027
163	21.3317	58.4089	0.0644	0.0041	0.1907	0.0647	9.1311	0.0859	10.5743	0.0236	0.3737	0.0771	0.0164	100.347
164	21.1801	58.1328	0.058	0.0032	0.1924	0.0618	9.0887	0.083	10.5881	0.025	0.379	0.0751	0.0052	99.8724
165	21.2093	58.1902	0.0565	0.0097	0.194	0.0639	9.0432	0.0833	10.5923	0.022	0.381	0.0735	0.0103	99.9292
166	21.3868	57.8107	0.0571	0.0039	0.1927	0.0643	9.1373	0.0838	10.5958	0.0234	0.3785	0.072	0.0122	99.8185
167	21.3611	57.9172	0.0879	0.0036	0.1935	0.0627	9.1297	0.083	10.5916	0.0235	0.374	0.0731	0.0053	99.9062
168	21.2358	58.073	0.0633	0.0052	0.1937	0.0646	9.1401	0.083	10.598	0.024	0.3813	0.0717	0.0126	99.9463
169	21.3061	57.9535	0.1219	0.008	0.1917	0.0629	8.9917	0.0845	10.5509	0.0287	0.3709	0.0756	0.0102	99.7566
170	21.2373	57.9563	0.0571	0.0057	0.1922	0.0641	9.1494	0.0829	10.5811	0.0228	0.3743	0.0773	0.0075	99.808
171	21.3608	58.1345	0.1647	0.0059	0.1917	0.0629	9.1605	0.0826	10.6465	0.025	0.3774	0.0715	0.0083	100.292
172	21.1948	58.1617	0.0706	0.0048	0.1937	0.0628	9.0826	0.0825	10.67	0.0238	0.3772	0.0731	0.0127	100.01
173	21.1633	57.8271	0.1354	0.0056	0.194	0.0642	9.0166	0.0802	10.6523	0.0248	0.3756	0.0707	0.009	99.6188
174	21.1874	57.8844	0.0706	0.0055	0.1929	0.0635	9.0549	0.0821	10.6759	0.0235	0.3752	0.0848	0.0124	99.7131
175	21.3805	57.0913	0.1388	0.0056	0.1959	0.0639	8.9443	0.0779	10.5819	0.0241	0.3754	0.0748	0.0096	98.964
176	21.1507	57.7767	0.0721	0.0064	0.1912	0.0625	9.0116	0.0791	10.6549	0.0248	0.3831	0.0767	0.0074	99.4972
177	21.3332	58.4446	0.0657	0.006	0.2242	0.0655	9.3073	0.0793	10.7895	0.0264	0.3618	0.0726	0.0106	100.787
178	21.2402	58.2875	0.064	0.0034	0.2071	0.0627	9.159	0.0796	10.7996	0.0258	0.3686	0.0719	0.0115	100.381
179	21.214	58.1863	0.0749	0.0046	0.2084	0.065	9.2002	0.0817	10.6853	0.0255	0.368	0.0719	0.0173	100.203
180	21.1044	57.9527	0.0685	0.0076	0.1952	0.0637	9.2679	0.0808	10.7667	0.0263	0.3692	0.0777	0.0049	99.9856
181	20.8578	57.8708	0.0648	0.0052	0.2157	0.064	9.1525	0.08	10.8225	0.0257	0.3661	0.0738	0.0086	99.6075
182	21.1765	58.0636	0.0648	0.0034	0.2127	0.0673	9.1341	0.084	10.4596	0.0218	0.3589	0.076	0.0066	99.7293
183	21.2195	58.2546	0.0614	0.0055	0.2127	0.0646	9.1568	0.0816	10.5203	0.0216	0.3698	0.0745	0.0112	100.054
184	21.334	58.5745	0.0623	0.0057	0.2157	0.0653	9.0507	0.0822	10.4593	0.0224	0.3712	0.0738	0.0096	100.327
185	21.3821	58.5509	0.1756	0.0067	0.2126	0.0645	9.096	0.0868	10.5117	0.0242	0.3659	0.0766	0.0086	100.562
186	21.3995	58.2511	0.0657	0.0042	0.2184	0.0657	9.0598	0.0836	10.4157	0.0249	0.3643	0.0739	0.009	100.036
187	21.0701	58.16	0.0605	0.0045	0.2171	0.0674	9.1502	0.0787	10.3922	0.021	0.36	0.0769	0.0107	99.6693
DL (3σ, ppm)	124	148	15	16	23	25	110	40	212	32	55	46	59
SE (3σ, ppm)	1309	1278	14	14	23	23	735	41	956	28	96	41	50
RSE	0.01	0.004	0.035	0.426	0.019	0.046	0.012	0.061	0.012	0.146	0.033	0.066	0.65
Max	22.3767	59.3506	0.1776	0.0877	0.2473	0.0747	9.3073	0.1002	11.3484	0.0299	0.4014	0.0894	0.0317
Min	20.0013	57.0913	0.0501	0.0021	0.179	0.0475	8.8106	0.0715	10.1553	0.0184	0.3298	0.0634	0.0046
Mean (n=307)	21.1999	58.2608	0.0818674	0.0047557	0.200076	0.0613362	9.06241	0.0846355	10.6675	0.0242622	0.368341	0.0751326	0.0101511
SD (σ, n=307)	0.247002	0.243322	0.0224518	0.00484996	0.009548	0.00373282	0.0655787	0.00458744	0.184161	0.00159902	0.00779095	0.00383261	0.00292282
RSD	0.0116511	0.00417643	0.274246	1.01982	0.0477218	0.0608584	0.00723634	0.0542023	0.0172638	0.0659058	0.0211515	0.0510114	0.287931
χ²/306	1.3	1	56	6.1	6.2	1.2	0.4	0.8	2.2	0.2	0.4	0.6	0.2
LBS13-04
1	14.577	11.0288	0.0822	0.031	0.1968	0.0784	60.4124	0.1571	14.5872	0.0285	0.1215	0.0363	-	101.337
2	14.416	11.0347	0.0211	0.0013	0.1981	0.0792	61.1923	0.1541	14.8859	0.0276	0.1178	0.0324	-	102.16
3	14.0312	10.8002	0.0415	0.009	0.196	0.0763	61.0531	0.1531	15.0511	0.0304	0.1172	0.0375	-	101.597
4	14.309	10.7803	0.0291	0.0027	0.2003	0.0809	59.5913	0.1518	14.1699	0.0263	0.1142	0.0341	-	99.4899
5	14.374	10.677	0.0455	0.0101	0.1972	0.0812	59.3364	0.1575	14.0811	0.0255	0.1132	0.0324	-	99.1311
6	14.4203	10.7861	0.0229	0.0055	0.1915	0.0795	60.4207	0.1543	14.2234	0.0288	0.1152	0.0354	-	100.484
7	14.6756	10.9515	0.0286	0.0013	0.1899	0.0754	60.5274	0.1515	14.4356	0.0251	0.1207	0.033	-	101.216
8	14.4784	10.8812	0.0735	0.0393	0.1944	0.0819	60.1756	0.1538	14.4039	0.0291	0.1205	0.0339	-	100.666
9	14.5647	10.8978	0.0566	0.0124	0.1921	0.0767	60.3736	0.155	14.5092	0.0272	0.1256	0.0329	-	101.024
10	14.1426	10.5941	0.0305	0.0053	0.196	0.0822	58.8559	0.1568	13.9785	0.0286	0.1193	0.0294	-	98.2192
11	14.146	10.5818	0.0743	0.0198	0.197	0.0767	59.7647	0.1576	14.0284	0.0272	0.1169	0.0337	-	99.2241
12	14.6023	10.9767	0.0323	0.0029	0.1917	0.0803	60.3419	0.1514	14.4751	0.0278	0.1199	0.0313	-	101.034
13	14.3806	10.8147	0.0239	0.0021	0.1952	0.0793	59.7382	0.1556	14.1715	0.0319	0.1128	0.035	-	99.7408
14	14.0425	10.5926	0.0265	0.006	0.1945	0.0793	59.0055	0.1546	14.0375	0.0296	0.1223	0.0395	-	98.3304
15	14.6811	10.9422	0.0405	0.005	0.1969	0.0769	60.8348	0.1529	14.5192	0.0265	0.1229	0.0313	-	101.63
16	14.3422	10.764	0.0245	0.0012	0.1943	0.0818	58.9921	0.1545	14.0834	0.0251	0.1193	0.0278	-	98.8102
17	14.4333	10.8048	0.0353	0.0096	0.1957	0.0795	59.4421	0.1556	14.2488	0.0281	0.1209	0.0323	-	99.586
18	14.5967	10.8644	0.0275	0.0022	0.1979	0.0791	59.9079	0.1544	14.3845	0.0233	0.1142	0.0289	-	100.381
19	14.3648	10.7493	0.0312	0.002	0.1966	0.0785	58.9583	0.1548	14.1828	0.0271	0.1179	0.0357	-	98.899
20	14.4844	10.8416	0.0264	0.001	0.1984	0.0805	60.0458	0.1552	14.3554	0.028	0.1168	0.0358	-	100.369
Mean (n=20)	14.4031	10.8182	0.038695	0.008485	0.195525	0.07918	59.9485	0.15458	14.3406	0.027585	0.118455	0.03343
SD (σ, n=20)	0.194178	0.135741	0.0185305	0.0103636	0.00263176	0.00198431	0.70856	0.00184836	0.282406	0.00198872	0.00345992	0.00291007
RSD	0.0134817	0.0125474	0.478886	1.2214	0.01346	0.0250607	0.0118195	0.0119573	0.0196927	0.0720944	0.0292087	0.0870498
Detection limit (DL) and standard error (SE) of single analytical spot are presented as element content in ppm.
Relative standard error (RSE) was obtained by dividing the standard error (SE) by the measured mean element concentration.
Relative standard deviation (RSD) is calculated as the standard deviation (SD) divided by the mean oxides values.
χ² is Chi-square test to distinguish analytical variation from true compositional heterogeneity. Degree of freedom is 306.
V content was obtained using a LLIF crystal and synthetic rutile as overlap standard.
Mn content was obtained using Cr2O3 as overlap standard

## Sheet: Table S3
Table S3 Bulk-sample XRF measurement results for BL-SP spinel.
Sample	BL-SP					Standards
	1	2	Mean	SD	RSD	DZE-2	GSR-1	GSR-2	GSR-3	GSR-4	GSR-5
wt%
Na2O	bdl	bdl				bdl	2.99	3.8	3.4	bdl	0.37
MgO	21.5	22.33	21.915	0.586899	0.0267807	38.63	0.41	1.71	7.76	0.07	1.99
Al2O3	58.21	57.4	57.805	0.572756	0.00990842	0.26	13.38	16.23	13.84	3.41	18.98
SiO2	0.11	0.17	0.14	0.0424264	0.303046	37.51	72.94	60.81	45.08	90.34	58.92
P2O5	bdl	bdl				0.01	0.12	0.24	0.96	0.21	0.15
K2O	bdl	bdl				0.02	5.01	1.88	2.41	0.66	4.31
CaO	0.17	bdl				1.91	1.51	5.17	8.81	0.3	0.62
TiO2	0.2	0.19	0.195	0.00707107	0.0362619	0.01	0.29	0.52	2.34	0.27	0.68
MnO	0.08	0.09	0.085	0.00707107	0.083189	0.1	0.06	0.08	0.17	0.02	0.02
Cr2O3	8.87	8.99	8.93	0.0848528	0.00950199	0.41	bdl	bdl	0.02	0.01	0.02
Fe2O3	11.38	10.75	11.065	0.445477	0.04026	6.92	2.12	4.82	13.37	3.29	7.78
ppm
V	423	457	440	24.0416	0.0546401	bdl	bdl	91	169	34.8	87.1
Ni	2896	3036	2966	98.9949	0.0333766	2339	bdl	bdl	138	24.2	58.3
Zn	607	595	601	8.48528	0.0141186	44	44	76	139	28	66
SD, standard deviation; RSD, relative standard deviation.

## Sheet: Table S4
Table S4 Bulk-sample ICP-MS (ppm) measurement results for BL-SP spinel.
Sample	BL-SP						Standards
	1	2	3	Mean	SD	RSD	BHVO-2-2	GSR-1	GSR-2	GSR-3	AGV-1	BHVO-2-1	W-2a	SARM-4
Ti	1253.43	1220.94	1208.88	1227.75	23.0425	0.0187681	15912	1825.7	3226.8	14026.5	6339.1	17459.7	6550.1	1191.1
V	427	418.7	410.5	418.733	8.25005	0.0197024	301.6	24.22	95.95	164.9	118.2	335.7	259.8	218.6
Mn	656.1	647.9	630.1	644.7	13.2921	0.0206175	1245.3	482	617.4	1352.7	755.7	1412.3	1304.6	1405.4
Co	181.6	178.3	178.1	179.333	1.96554	0.0109602	43.13	3.382	13.39	48.1	15.56	48.12	44.83	61.86
Ni	2901.4	2839.4	2796.1	2845.63	52.926	0.018599	121.7	2.28	17.4	140.7	19.02	121.7	69.69	118.6
Zn	564.9	560.9	555.8	560.533	4.56107	0.00813701	104	26.66	70.42	148.7	88.79	112.5	77.55	58.8
Ga	73.1961	72.5155	71.2696	72.3271	0.976974	0.0135077	20.68	20.01	18.99	24.59	20.67	22.66	18.15	17.1
SD, standard deviation; RSD, relative standard deviation.

## Sheet: Table S5
Table S5 Element composition measurement results of overlap standards.
Sample	synthetic Ti-rich glass		synthetic titanite		QB6-1		Rutile		RbTiPO5		Cr2O3		Crocoite
	mean	SD	mean	SD	mean	SD	mean	SD	mean	SD	mean	SD	mean	SD
EPMA (wt%)	n=10		n=10		n=10		n=10		n=10		n=10		n=10
SiO2	49.78	0.84	28.61	0.28	36.75	0.49	bdl	-	bdl	-	bdl	-	0.08	0.03
TiO2	17.9	0.31	41.65	0.23	3.42	0.33	99.08	-	32.62	0.18	bdl	-	bdl	-
Al2O3	11.11	0.17	0.6	0.04	14.19	0.32	bdl	-	bdl	-	bdl	-	bdl	-
FeO	0.05	0.01	0.03	0.02	17.58	0.74	bdl	-	bdl	-	bdl	-	bdl	-
MnO	bdl	-	bdl	-	bdl	-	bdl	-	bdl	-	bdl	-	bdl	-
MgO	0.08	0	bdl	-	14	0.56	bdl	-	bdl	-	bdl	-	bdl	-
CaO	15.01	0.24	27.98	0.08	0.03	0.02	bdl	-	bdl	-	bdl	-	bdl	-
Na2O	5.19	0.1	0.04	0.03	0.11	0.02	bdl	-	bdl	-	bdl	-	bdl	-
K2O	0.84	0.03	bdl	-	9.83	0.13	bdl	-	bdl	-	bdl	-	bdl	-
P2O5	-	-	-	-	-	-	-	-	30.13	0.21	-	-	-	-
F	-	-	-	-	-	-	-	-	-	-	-	-	-	-
Cl	-	-	-	-	-	-	-	-	-	-	-	-	-	-
V2O3	bdl	-	bdl	-	bdl	-	bdl	-	bdl	-	bdl	-	bdl	-
Cr2O3	bdl	-	bdl	-	bdl	-	bdl	-	bdl	-	99.31	-	30.94	0.57
Rb2O	-	-	-	-	-	-	-	-	38.54	0.27	-	-	-	-
PbO	-	-	-	-	-	-	-	-	-	-	-	-	69.22	1.35
LA-ICP-MS (ppm)	n=5		n=5
Sc	2.4075	0.198221	0.395385	0.150201
V	1.62575	0.155303	0.366154	0.115509
Co	0.34	0.14336	bdl	-
Ni	3.6525	2.01156	bdl	-
Rb	3.1275	0.0512348	bdl	-
Sr	48.695	1.22628	8.78385	1.93103
Y	1.37875	0.151812	91.1708	14.7084
Zr	32.0275	1.45967	91.0885	29.4593
Nb	33.8275	0.534314	92.18	26.9013
Ba	7.155	0.146401	bdl	bdl
Hf	1.0385	0.0510588	85.3254	24.9132
Ta	2.81825	0.91194	104.686	18.8804
bdl, below detection limit.
Analytical conditions of EPMA and LA-ICP-MS for overlap standars are the same as those for BL-SP.
V content was obtained using a LLIF crystal and synthetic rutile as overlap standard.
Mn content was obtained using Cr metal as overlap standard.
